# Supplementary material
Source: PubMed Central journal article supplement (PMC5946737)
Supplement: Supp_Fig1.pdf [file Supp_Fig1.pdf]

## Supplementary Data

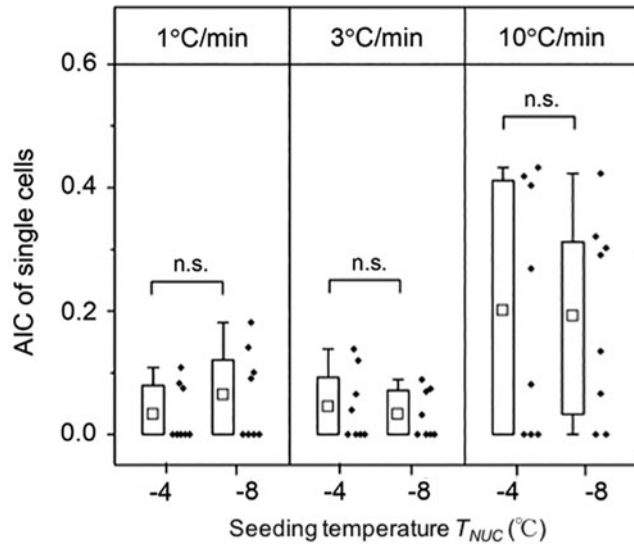

**SUPPLEMENTARY FIG. S1.** AIC of single cells grouped by cooling rate ( $n=8$ ,  $p>0.05$ ). Ends of the whiskers represent the minimum and maximum of the data. The bottom and top of the box are the first and third quartiles, and the square inside the box is the mean. AIC, the area ratio of intracellular ice to cell.
